# Supplementary material for: Processing moving visual scenes during upright stance in elderly patients with mild cognitive impairment
Source: PeerJ. 2020 Nov 18;8:e10363. doi: 10.7717/peerj.10363 (PMC7680028; doi:10.7717/peerj.10363)
Supplement: Supplemental Information 2 [file peerj-08-10363-s002.xlsx]

## Sheet: Hárok1
RMS_ML (mm)
Scene direction	scene rotating to the left				scene rotating to the right
Controls	before stimulation	stimulation	after stimulation		before stimulation	stimulation	after stimulation
C1	7.15272	11.7407	8.42926		9.27063	7.99454	10.2816
C2	8.45283	9.49176	7.27498		5.9458	8.94585	6.37904
C3	2.87831	8.75875	6.04473		2.37419	6.36876	5.4063
C4	1.73235	3.84336	3.24345		2.48054	5.91329	5.15144
C5	5.53211	8.79551	9.91595		4.88316	7.10612	5.58575
C6	6.18337	9.28024	5.9588		6.07533	8.26573	6.87465
C7	5.50217	8.72324	8.5643		6.10303	6.9272	4.46943
C8	3.12402	2.74805	2.9826		3.25144	3.50597	5.09679
C9	4.64934	8.41928	6.60965		5.2279	7.14083	5.20153
C10	3.01387	6.51233	5.76048		3.67933	6.52052	4.51345
Patients
P1	10.5578	13.7328	13.6412		12.319	16.7459	12.4552
P2	5.2057	5.17208	7.84848		5.62221	5.35468	10.4946
P3	10.1387	12.6547	11.0228		12.8936	13.5341	13.9708
P4	3.58929	15.1332	12.6215		7.83224	6.57068	14.6398
P5	4.9358	5.9674	7.92974		4.25177	5.87442	9.14169
P6	3.06547	23.4455	17.5404		3.51121	9.81584	6.81388
P7	6.59261	7.65082	6.47039		7.68793	9.59215	7.17504
P8	5.21422	13.1473	12.0761		5.20458	7.93419	8.84635
P9	8.00044	8.10723	9.60238		6.64407	6.58336	7.75057
P10	5.48369	37.6074	15.5173		3.6108	46.2739	23.5197
RMS_AP (mm)
	scene moving to the subject				scene moving from the subject
Controls	before stimulation	stimulation	after stimulation		before stimulation	stimulation	after stimulation
C1	11.0448	11.9959	11.4616		8.91348	12.3325	9.99072
C2	5.58174	8.10895	6.01541		7.625	7.21425	6.75837
C3	6.73319	11.5162	10.5354		6.00388	11.9354	9.64169
C4	4.79386	7.14265	5.17502		4.21465	6.25589	5.36782
C5	6.33719	8.59961	10.4849		5.22218	7.59076	8.56195
C6	5.48191	13.5322	15.6172		4.98876	8.89373	6.64816
C7	6.61798	19.8818	12.1638		5.89649	13.3009	9.3612
C8	5.71718	18.2608	11.4283		5.76473	9.52414	5.62022
C9	5.93838	17.5641	10.5857		5.61623	9.80458	6.89327
C10	4.85898	8.72876	5.96164		4.45934	6.40518	5.34589
Patients
P1	13.0025	16.9568	11.5968		10.4866	18.9199	15.9951
P2	7.76344	13.9384	14.682		6.76433	11.7138	19.0719
P3	9.25812	19.1746	13.6374		8.83117	19.0879	11.647
P4	9.37211	16.1518	16.6217		6.30504	9.82354	10.6958
P5	5.2224	10.2067	7.57756		6.20468	8.7118	9.97152
P6	6.06568	25.8997	31.1517		7.35724	10.6891	8.97179
P7	9.67003	8.14053	9.94035		9.82375	10.8247	9.91517
P8	7.4575	12.4872	11.4365		8.11711	9.636	10.3959
P9	9.06882	17.5336	21.772		8.20551	13.395	14.7345
P10	14.8141	39.1494	26.6734		8.54028	41.8719	32.7416

## Sheet: priemery
rmsx k
MEAN	4.5957	8.25909	6.31005		4.79313	6.94756	5.83083		4.97206	6.67536	6.28134		4.83074	5.79429	4.9255
SD	2.16897	3.18454	1.97934		2.1436	1.53442	1.73748		1.50887	1.98065	2.04317		1.80469	1.73913	1.51055
rmsx p
MEAN	6.27837	14.2618	11.427		6.95774	12.8279	11.4808		6.7354	10.9779	13.4033		6.93028	10.0269	10.7567
SD	2.55061	9.81623	3.55829		3.34389	12.2942	5.05177		3.12566	6.57785	6.94663		2.63926	7.72784	6.72225
rmsy k
MEAN	5.1976	9.99474	6.32341		6.05805	9.19997	6.19879		6.35238	13.5383	10.5184		5.9895	10.3821	7.45661
SD	1.22375	3.86333	1.62773		2.20866	2.71978	1.37623		1.79452	4.77116	3.84059		1.41795	3.67136	1.84601
rmsy p
MEAN	6.88008	14.8208	11.3677		7.79695	13.1735	11.8278		9.16947	17.9639	16.5089		8.06357	15.4674	14.414
SD	1.9293	9.2153	5.16218		2.7883	7.78525	4.733		2.92469	8.94813	7.67245		1.4354	9.98049	7.20663
LI k
MEAN	238.566	551.019	292.289		250.441	455.031	274.99		289.741	684.025	406.087		254.533	481.243	277.042
SD	49.6681	237.912	79.7		59.159	118.537	47.0033		54.89	378.541	151.091		59.9043	205.457	62.6995
LI p
MEAN	312.732	874.595	559.098		361.56	726.621	532.895		416.848	836.902	798.653		402.551	703.837	547.521
SD	178.58	529.476	260.805		216.474	333.448	245.143		275.342	425.5	642.3		328.436	302.857	286.115
MEAN	6.88008	14.8208	11.3677		7.79695	13.1735	11.8278		9.16947	17.9639	16.5089		8.06357	15.4674	14.414
SD	1.9293	9.2153	5.16218		2.7883	7.78525	4.733		2.92469	8.94813	7.67245		1.4354	9.98049	7.20663
t-test y	0.0317233	0.144065	0.00862213		0.139529	0.144964	0.00199619		0.0182447	0.184465	0.0404654		0.00443874	0.147849	0.00842963
