# Supplementary material for: Processing moving visual scenes during upright stance in elderly patients with mild cognitive impairment
Source: PeerJ. 2020 Nov 18;8:e10363. doi: 10.7717/peerj.10363 (PMC7680028; doi:10.7717/peerj.10363)
Supplement: Supplemental Information 3 — a Descriptive values are given with standard deviations in parentheses. [file peerj-08-10363-s003.xlsx]

## Sheet: Hárok1
		Pre-stimulus		Stimulus		Post-stimulus		Repeated measures ANOVA
		controls	patients	controls	patients	controls	patients	STIMULUS	GROUP	INTERACTION
		group averages in milimeters (SD in brackets)
TP of COP	LEFT	230.1 (43.2)	312.7 (178.6)	493.6 (165.2)	900.2 (542.3)	286.3 (71.3)	559.1 (260.8)	F=17.177, p<0.001, η2=0.488	F=8.546, p=0.009, η2=0.322	F=1.589, p=0.144, η2=0.111
	RIGHT	245.7 (57.1)	361.6 (216.5)	428.2 (88.2)	726.6 (333.4)	269.3 (44.9)	532.9 (245.1)	F=21.372, p<0.001, η2=0.543	F=9.626, p=0.006, η2=0.348	F=2.609, p=0.112, η2=0.100
	TO	283.5 (49.3)	416.8 (275.3)	635.6 (386.0)	836.9 (425.5)	385.1 (143.8)	798.7 (642.3)	F=9.309, p=0.001, η2=0.341	F= 3.628, p=0.073, η2=0.168	F=1.306, p=0.284, η2=0.068
	FROM	251.9 (58.0)	402.6 (328.4)	441.0 (172.2)	703.8 (302.9)	265.5 (49.4)	547.5 (286.1)	F=29.667, p<0.001, η2=0.622	F=5.869, p=0.026, η2=0.246	F=1.457, p=0.124, η2=0.117
RMS	LEFT	4.82 (2.13)	6.28 (2.55)	7.83 (2.72)	14.26 (9.82)	6.48 (2.22)	11.43 (3.56)	F=9.381, p=0.004, η2=0.343	F=8.225, p=0.010, η2=0.314	F=1.988, p=0.172, η2=0.099
	RIGHT	4.93 (2.10)	6.96 (3.34)	6.87 (1.50)	12.83 (12.29)	5.90 (1.71)	11.48 (5.05)	F=3.387, p<0.076, η2=0.554	F=5.993, p=0.025, η2=0.250	F=0.991,p=0.343, η2=0.052
	TO	6.31 (1.79)	9.17 (2.92)	12.53 (4.63)	17.96 (8.95)	9.94 (3.28)	16.51 (7.67)	F=18.896, p<0.001, η2=0.512	F=6.183, p=0.023, η2=0.256	F=1.129, p=0.335, η2=0.059
	FROM	5.87 (1.43)	8.06 (1.44)	9.33 (2.53)	15.47 (9.98)	7.42 (1.82)	14.41 (7.21)	F=10.880, p < 0.001, η2=0.377	F=7.293, p=0.015, η2=0.288	F=2.226, p=0.140, η2=0.112
